# Supplementary material for: Beyond buzzwords: NLP reveals common threads in sustainable and circular construction discourse
Source: PeerJ journal article supplement (doi:10.7717/peerj-cs.3085), 2025-07-31
Supplement: Reproducibility.pdf [file Reproducibility.pdf]

# Reproducibility

## Dataset (DOI/URL)

<https://data.mendeley.com/datasets/6w74d7x8s4/2>

## Computing infrastructure (operating system, hardware etc)

### Requirements

To run the notebooks in this repository, you will need the following Python packages:

- pandas
- numpy
- scikit-learn
- nltk
- matplotlib
- networkx
- gensim

To install the required dependencies, you can run:

```
pip install -r requirements.txt
```
